# Supplementary material
Source: PubMed Central journal article supplement (PMC2048804)

**A**

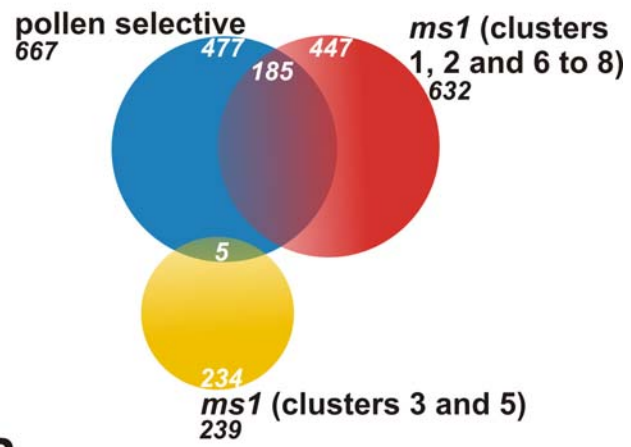

**B**

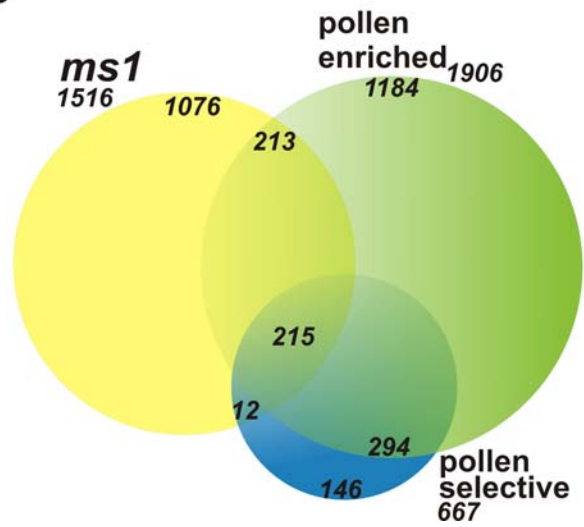

Supplement: plntphys_pp.107.104422_1.pdf [file plntphys_pp.107.104422_1.pdf]

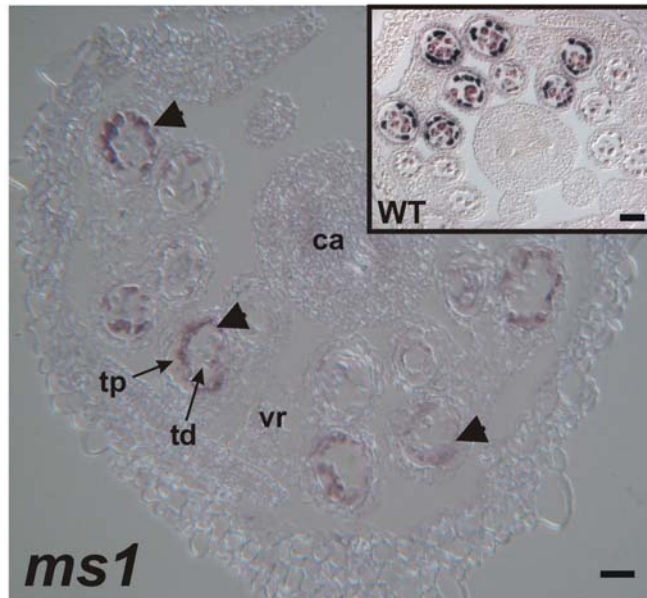

Supplement: plntphys_pp.107.104422_2.pdf [file plntphys_pp.107.104422_2.pdf]

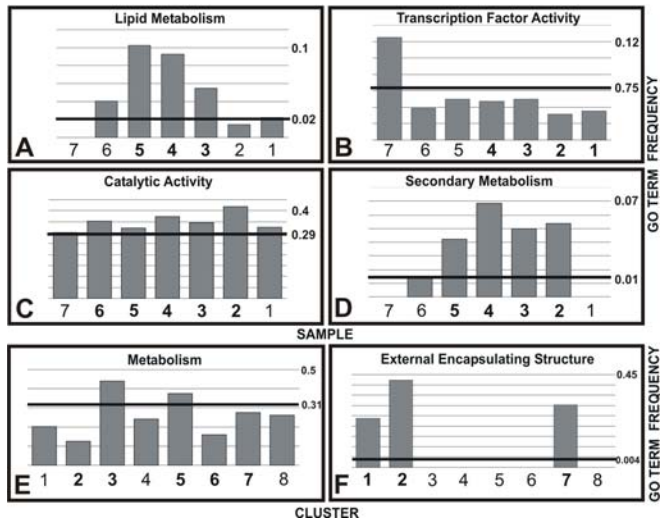

Supplement: plntphys_pp.107.104422_3.pdf [file plntphys_pp.107.104422_3.pdf]

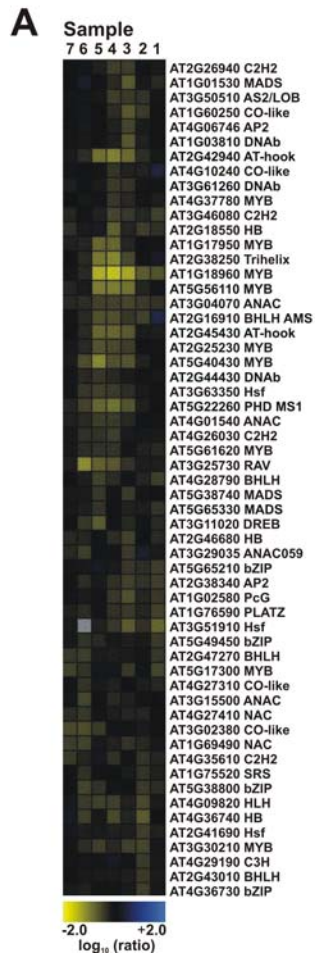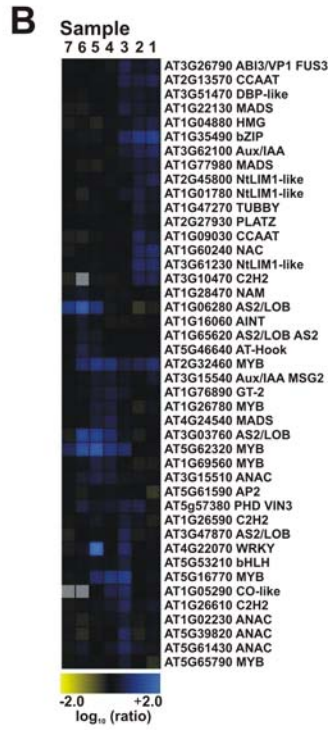

Supplement: plntphys_pp.107.104422_4.pdf [file plntphys_pp.107.104422_4.pdf]

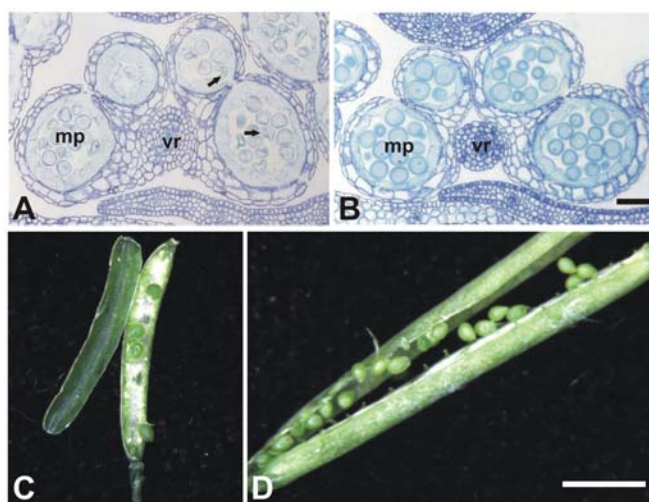

Supplement: plntphys_pp.107.104422_5.pdf [file plntphys_pp.107.104422_5.pdf]
